# Supplementary material
Source: PubMed Central journal article supplement (PMC3834093)
Supplement: NIHMS516828-supplement-109_2013_1076_MOESM1_ESM.pdf [file NIHMS516828-supplement-109_2013_1076_MOESM1_ESM.pdf]

**Supplementary Table 1. Clinical characteristics of AML patients**

| Patient number | source | age/sex | FAB | %                         |                     | Disease status       | Cytogenetics                                     |
|----------------|--------|---------|-----|---------------------------|---------------------|----------------------|--------------------------------------------------|
|                |        |         |     | WBC (x10 <sup>9</sup> /L) | BM Blast (PB Blast) |                      |                                                  |
| 1              | PB     | 80/F    | M4  | 48.9                      | 84.4(49)            | Primary refractory   | 46,XX (20/20)                                    |
| 2              | BM     | 22/M    | M5  | 11.4                      | 95.4(71)            | Relapse / refractory | 46,XY,t(6;11)(q27;q23) (19/20) 47,sl,+mar (1/20) |
| 3              | BM     | 63/M    | M5  | 265.0                     | 79.2(73)            | Primary refractory   | 46,XY(20/20)                                     |
| 4              | BM     | 30/M    | M1  | 175                       | 91.4(95.8)          | Newly diagnosed      | 46,XY(20/20)                                     |

FAB, French-American-British (classification) of AML.

**Supplementary Figure 1**

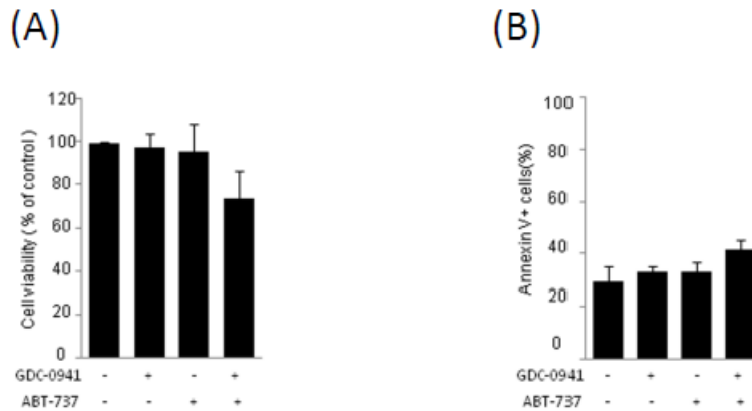

**Supplementary Figure 1.** Normal CD34<sup>+</sup> cells (n=3) co-cultured with normal BM-derived MSCs were incubated for 24 hours with 0.5μM GDC-0941, 0.05μM ABT-737, or both, under normoxic conditions. The viable cells number was measured by trypan blue exclusion assay (A). The annexin V–positive fractions were measured by flow cytometry (B). Graphs show the means ± SEM of results of three independent experiments.

### Supplementary Figure 2

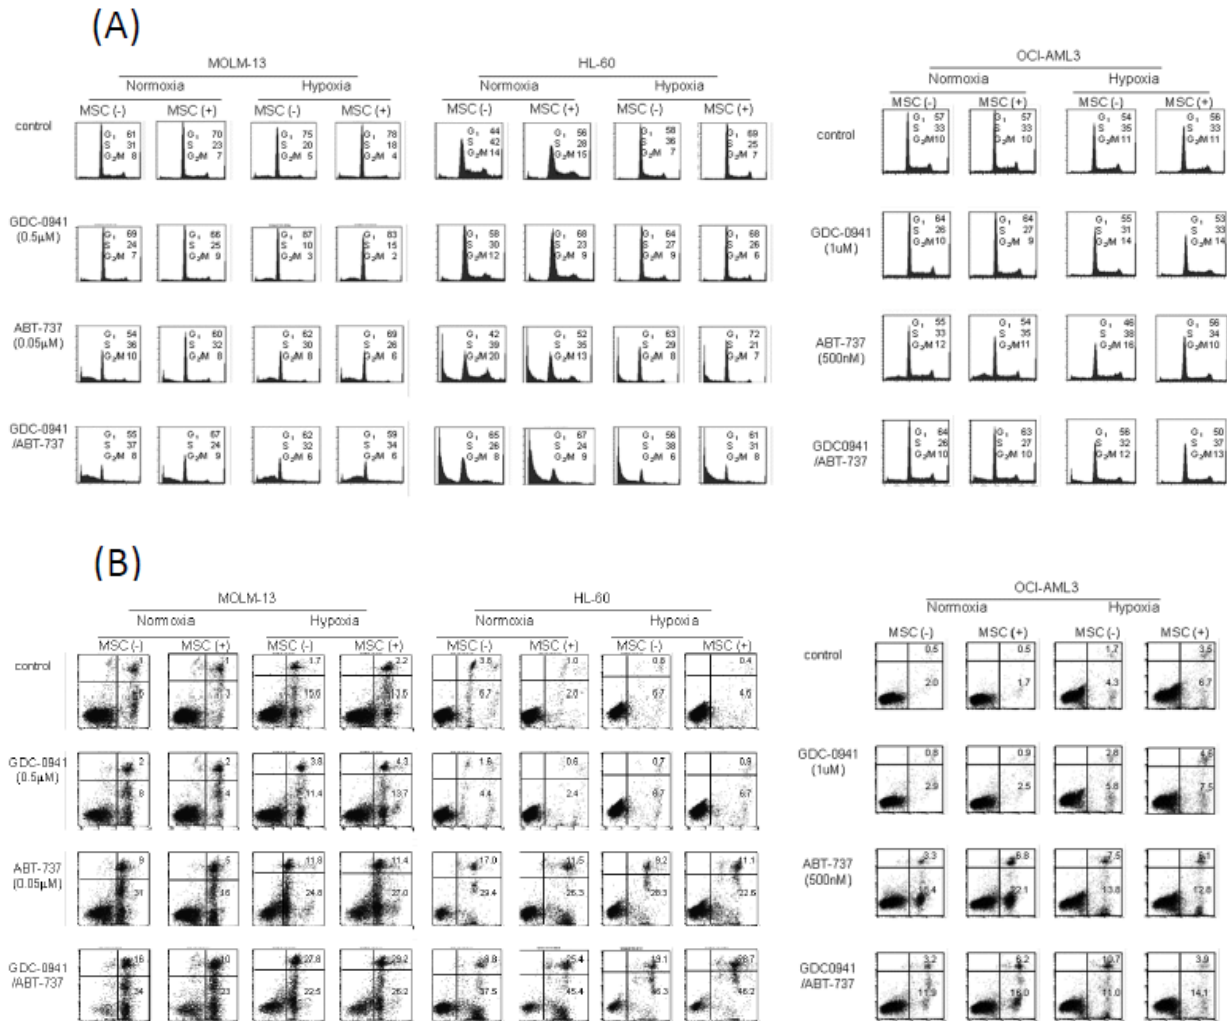

**Supplementary Figure 2.** MOLM-13, HL-60 and OCI-AML3 cells were incubated for 48 hours with 0.5µM GDC-0941, 0.05µM ABT-737, or both, with or without MSC co-culture under normoxic or hypoxic conditions. Representative results of three independent experiments for DNA content (A) and annexin V–positive fractions (B) measured by flow cytometry are shown.

### Supplementary Figure 3

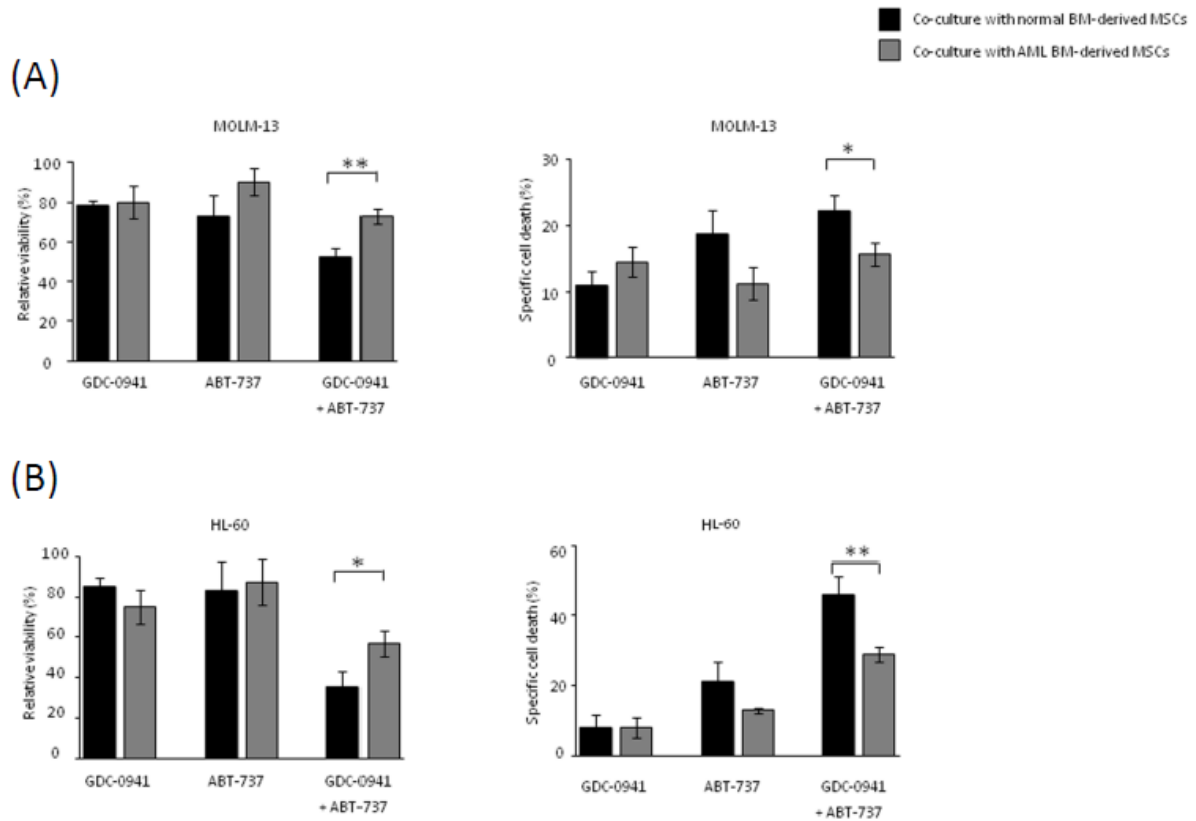

**Supplementary Figure 3.** MOLM-13 (A) and HL-60 (B) cells were incubated for 48 hours with 0.5 $\mu$ M GDC-0941, 0.05 $\mu$ M ABT-737, or both, in the presence of absence of MSCs derived from 3 normal BM or 3 AML patients BM under normoxic condition. Relative viability and specific cell death induction were calculated (trypan blue exclusion assay). Relative viability (%) = (viable cell numbers in treated group/viable cell numbers in control group) x 100. Specific cell death (%) = (% viable trypan blue positive cell numbers in control group - % trypan blue positive cell numbers in treated group) / (100 - % trypan blue positive cell numbers in treated group) x100. \* $p$ <0.05, \*\*  $p$ <0.01.

### Supplementary Figure 4

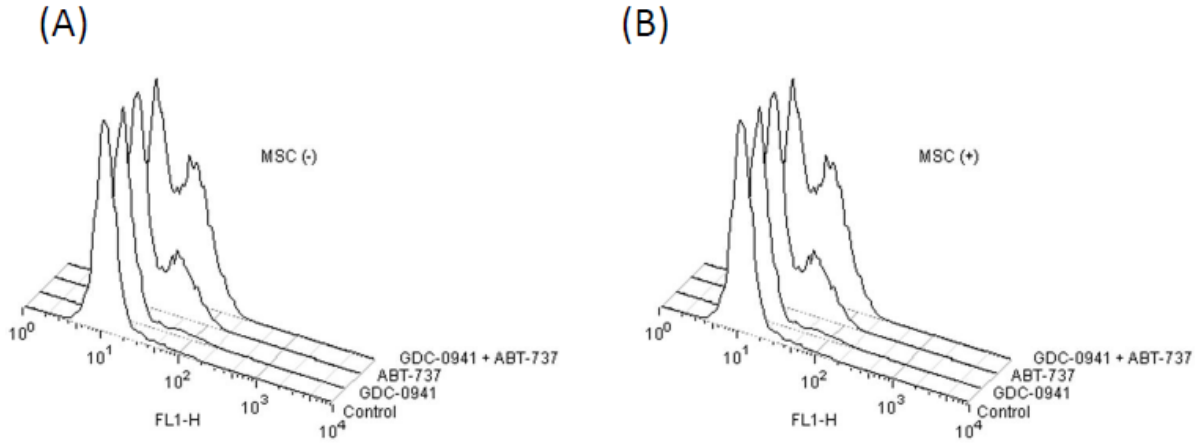

**Supplementary Figure 4. Combination of GDC-0941 and ABT-737 induced mitochondrial apoptosis in MOLM-13 cells.** MOLM-13 cells were treated with 0.5 $\mu$ M GDC-0941, 0.05 $\mu$ M ABT-737, or both, with or without MSC co-culture conditions; representative flow cytometry results of Bax conformational change after 16 hours of treatment.

### Supplementary Figure 5

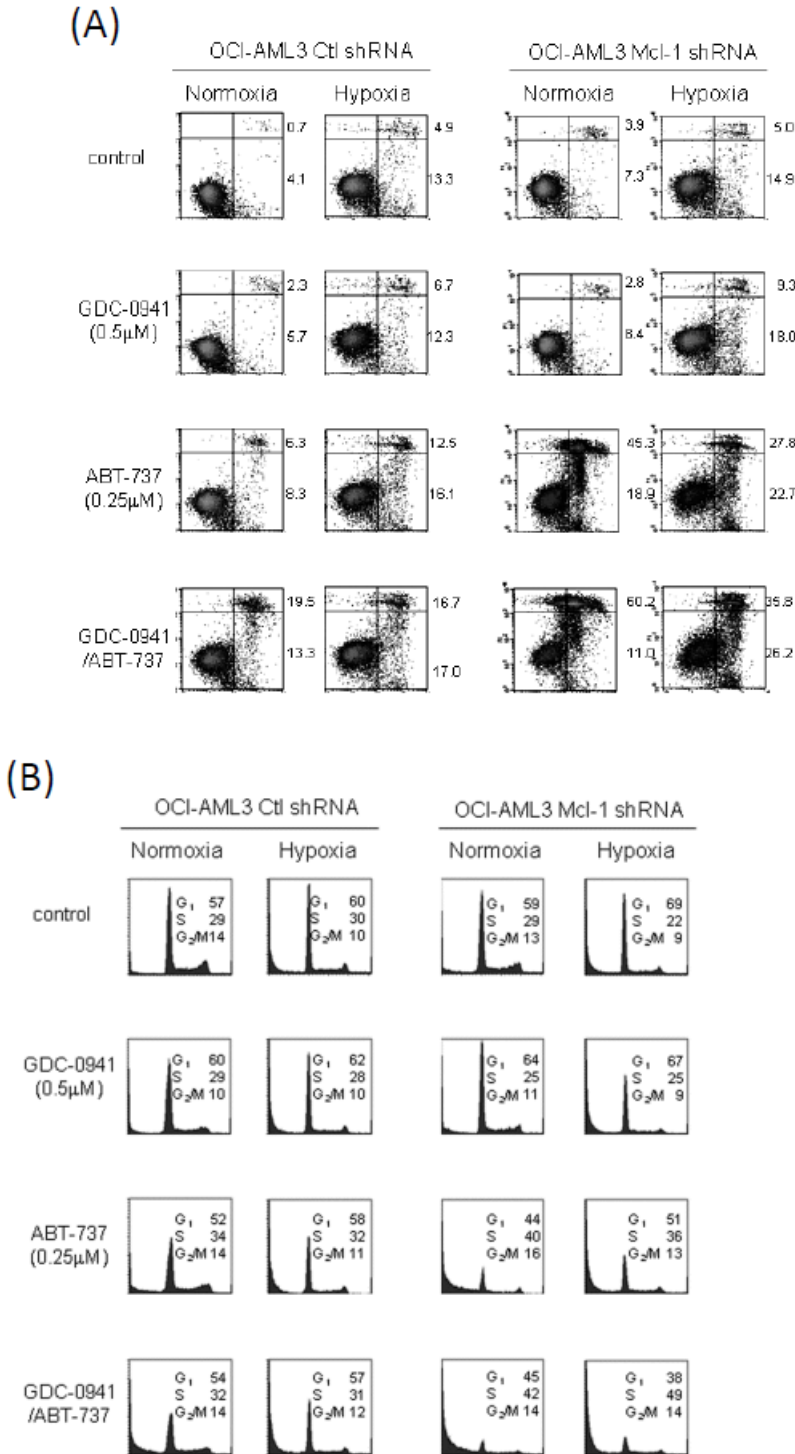

**Supplementary Figure 5.** Mcl-1 shRNA or scrambled control shRNA transfected OCI-AML3 cells were incubated for 48 hours with 0.5 $\mu$ M GDC-0941, 0.25 $\mu$ M ABT-737, or both, with or without MSC co-culture under normoxic or hypoxic conditions. Representative results of three independent experiments for annexin V–positive fractions (A) and DNA content (B) measured by flow cytometry are shown.
